# Supplementary material for: Neutron radiography of liquid foam structure near a vertical wall
Source: Royal Society of Chemistry journal article supplement (doi:10.1039/d3sm00983a), 2023-01-01
Supplement: d3sm00983a2.pdf [file d3sm00983a2.pdf]

## A Validation of neutron radiography

The method proposed in Section 2.2 to determine the liquid fraction was initially tested for its validity. The same procedure described by Equations 1 and 2 was used to estimate the thickness  $\Delta_w$  of a glass wedge filled with a foaming solution, as depicted in Figure A2 (a). For the reader's convenience, we repeat the adopted analysis to estimate the wedge thickness  $\Delta_w$ .

The measured transmittance of neutron beam,

$$T = \Phi / \Phi_0 \quad (1)$$

with the signal intensity without  $\Phi_0$  and with  $\Phi$  foaming solution in the wedge. The amount of water  $\Delta_w$ , representing the wedge thickness, along the path of the neutron beam through the wedge can be calculated

$$\Delta_w = -\frac{1}{\mu} \ln(T). \quad (2)$$

The thickness of the wedge varied between 0.5 mm to 3 mm, corresponding to liquid fraction values ranging from 0.5 % to 3 %.

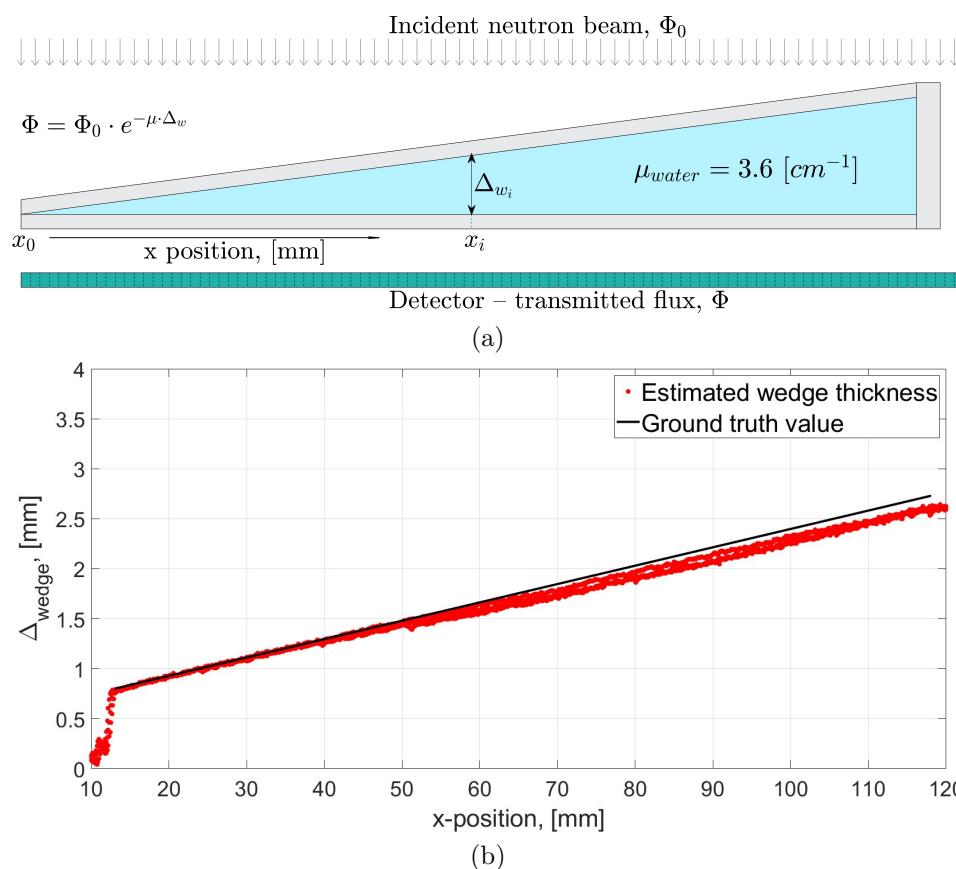

Figure A2: The wedge geometry (a) and the comparison (b) of measured  $\tilde{\Delta}_w$  (dots) — Eq. 2 and actual wedge depth  $\Delta_w$  (solid line).

The results demonstrated a high level of agreement between the actual wedge thickness  $\Delta_w$  and the estimated values  $\tilde{\Delta}_w$  obtained through neutron radiography (Figure A2, (b)). The relative deviation between the estimated and actual wedge thickness fell within an acceptable range of  $\pm 10\%$ .
